# Supplementary material for: Amphiphilic hyperbranched copolymers bearing a hyperbranched core and a dendritic shell as novel stabilizers rendering gold nanoparticles with an unprecedentedly long lifetime in the catalytic reduction of 4-nitrophenol
Source: Royal Society of Chemistry journal article supplement (doi:10.1039/c2jm34445a), 2012-01-01
Supplement: c2jm34445a.pdf [file c2jm34445a.pdf]

## *ESI*

# Amphiphilic hyperbranched copolymers bearing a hyperbranched core and dendritic shell as novel stabilizers rendering gold nanoparticles unprecedentedly long lifetime in the catalytic reduction of 4-nitrophenol

Yi Liu,<sup>a</sup> You Fan,<sup>a</sup> Yuan Yuan,<sup>a</sup> Yu Chen,<sup>\* a</sup> Fa Cheng<sup>a</sup> and Shi-Chun Jiang<sup>\*,b</sup>

<sup>a</sup> Department of Chemistry, School of Sciences, Tianjin University, 300072 Tianjin, People's Republic of China

<sup>b</sup> Department of Polymer Materials Science and Engineering, School of Materials Science and Engineering, Tianjin University, 300072 Tianjin, People's Republic of China

Corresponding author, Tel.: +86-22-27405053; fax: +86-22-27403475

E-mail: [chenyu@tju.edu.cn](mailto:chenyu@tju.edu.cn) (Yu Chen)

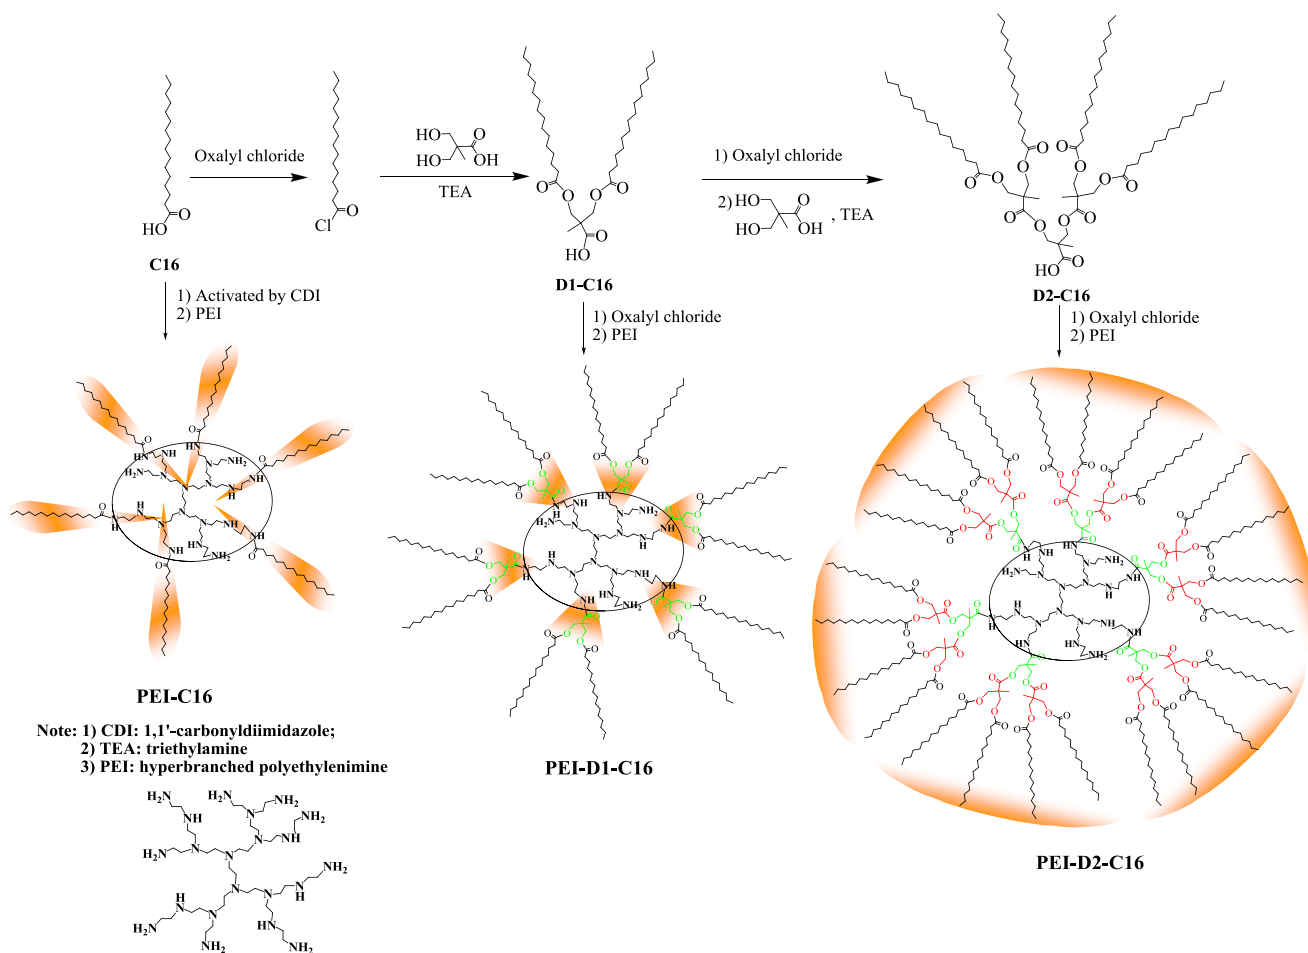

**Fig. S1** Syntheses of amphiphilic copolymers with hydrophilic amidated PEI core and hydrophobic linear or branched shell

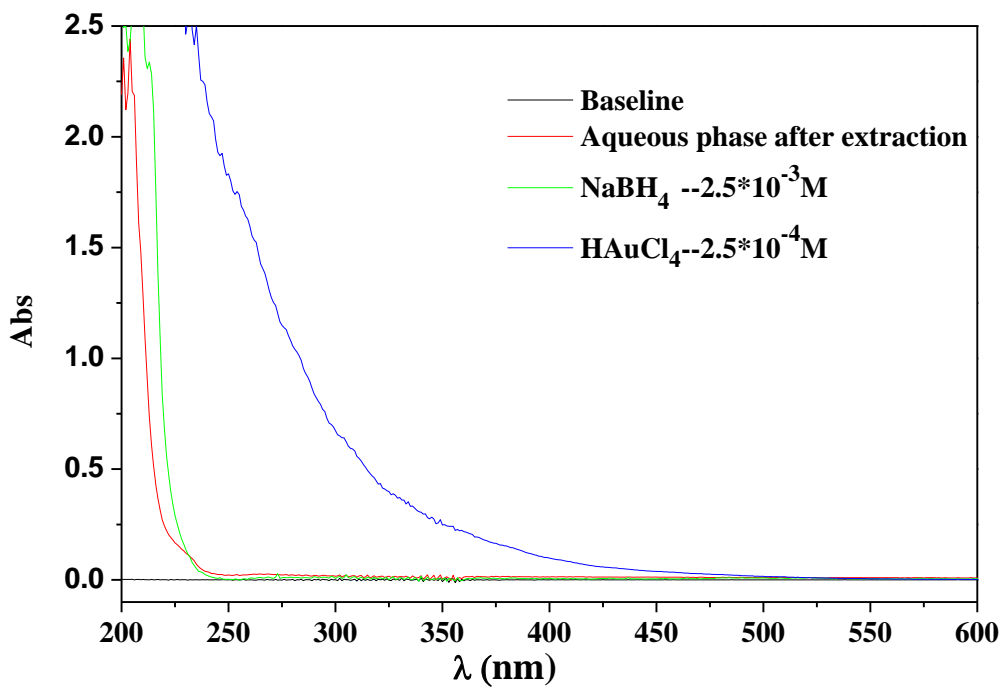

**Fig. S2** The typical UV-vis absorbance spectra of HAuCl<sub>4</sub> in water, NaBH<sub>4</sub> in water and the water that has been used to extract the organic solution of AuNPs stabilized by the amphiphilic hyperbranched copolymers

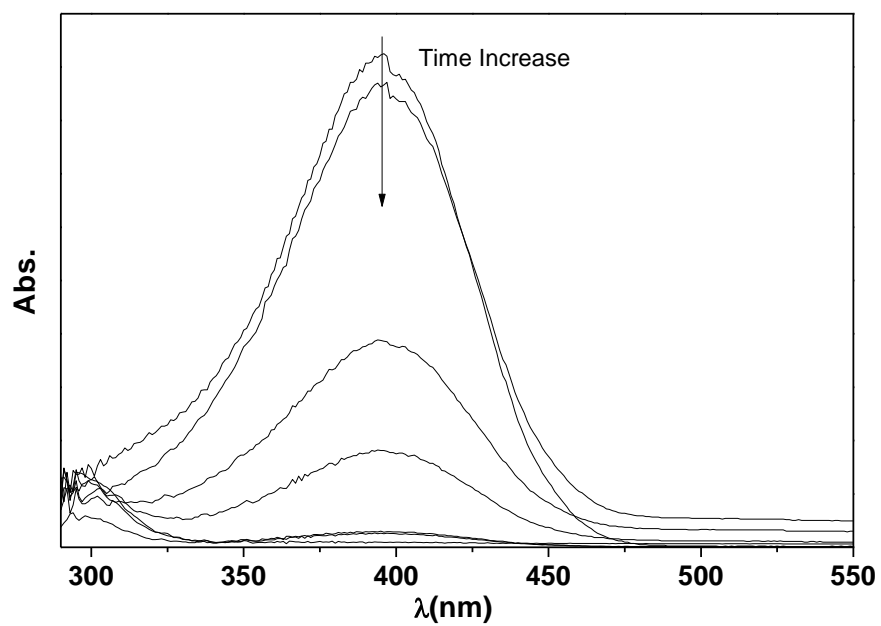

**Fig. S3** The typical UV-vis absorbance spectra of the AuNP catalyzed reduction of 4-nitrophenol by NaBH<sub>4</sub>

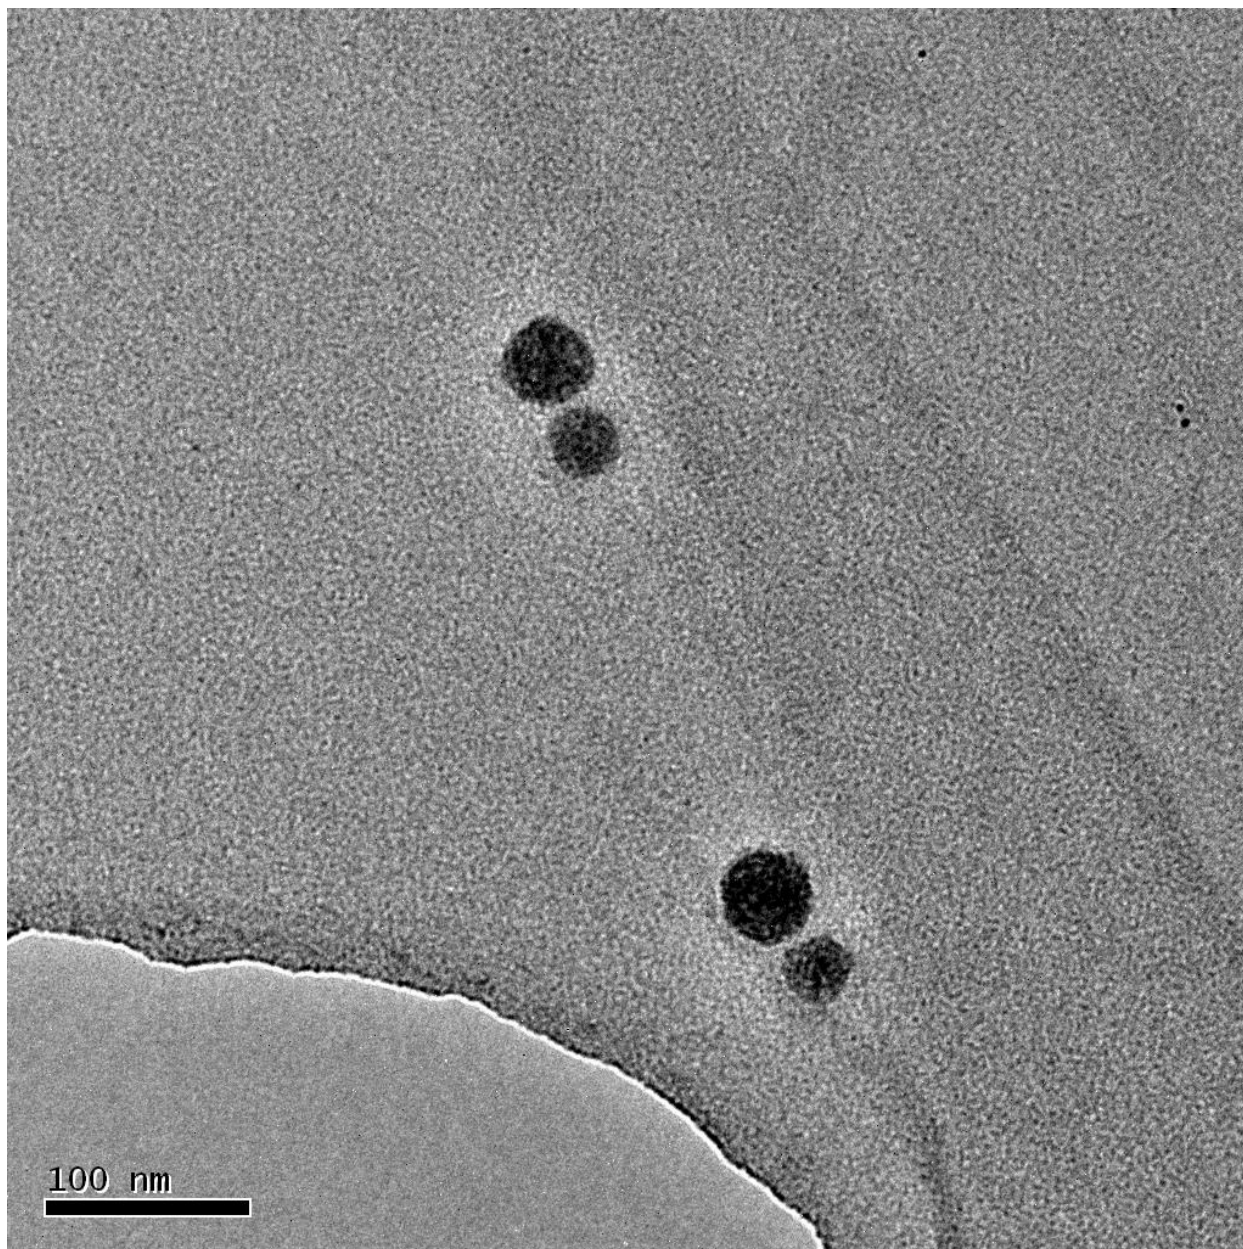

**Fig. S4** Typical TEM image of gold nanoparticles showing very less catalytic activity after reusing certain times
